# Supplementary material for: Isolation and Characterization of the Acadevirus Members BigMira and MidiMira Infecting a Highly Pathogenic Proteus mirabilis Strain
Source: MDPI journal article supplement (doi:10.3390/microorganisms11092141), 2023-08-23
Supplement: s1 [file s1]

# Isolation and characterization of the *Acadievirus* members BigMira and MidiMira, infecting a highly pathogenic *Proteus mirabilis* strain

Jéssica Duarte da Silva<sup>1</sup>, Lene Bens<sup>2</sup>, Adriele Jéssica do Carmo<sup>1</sup>, Rob Lavigne<sup>2</sup>, José Júnior Ferreira Soares<sup>1</sup>, Luís Daniel Rodrigues Melo<sup>3</sup>, Marta Vallino<sup>4</sup>, Roberto Sousa Dias<sup>5</sup>, Zuzanna Drulis-Kawa<sup>6</sup>, Sérgio Oliveira de Paula<sup>1,5</sup>, Jeroen Wagemans<sup>2\*</sup>.

<sup>1</sup> Laboratory of Molecular Immunovirology, Department of Microbiology, Federal University of Viçosa, Viçosa, Brazil.

<sup>2</sup> Laboratory of Gene Technology, Department of Biosystems (Division of Animal and Human Health Engineering), KU Leuven, Leuven, Belgium.

<sup>3</sup> Centre of Biological Engineering, University of Minho, Braga, Portugal

<sup>4</sup> Institute for Sustainable Plant Protection, National Research Council of Italy, Torino, Italy.

<sup>5</sup> Department of General Biology, Federal University of Viçosa, Viçosa, Brazil.

<sup>6</sup> Department of Pathogen Biology and Immunology, University of Wrocław, Wrocław, Poland.

\* Correspondence: jeroen.wagemans@kuleuven.be

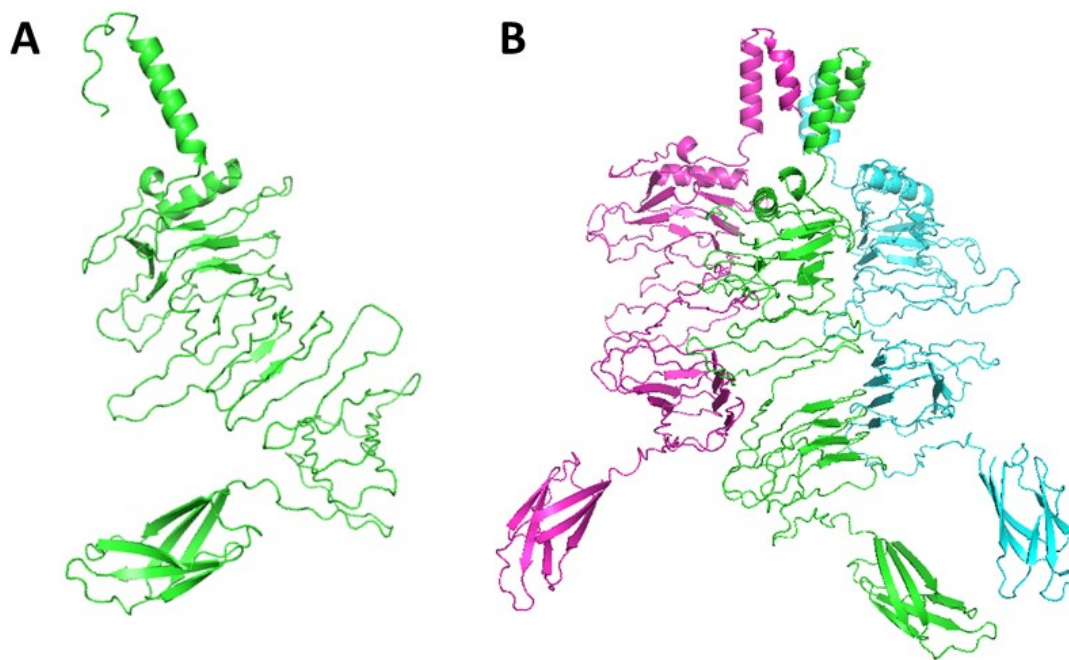

**Figure S1: 3D prediction of Gp 52, a hypothetical protein.** A. Monomer folding prediction. B. Trimer prediction.

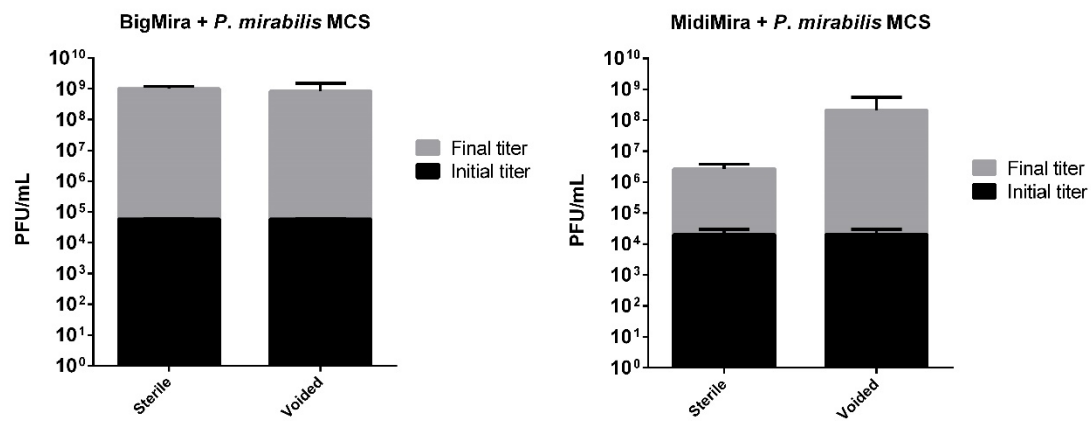

**Figure S2: Phages BigMira and MidiMira propagation rate in sterile and voided urine after 24 hours of incubation.**
